# Supplementary material for: Epithelial-to-mesenchymal transition is dispensable for metastasis but induces chemoresistance in pancreatic cancer
Source: Springer Nature journal article supplement (doi:10.1038/nature16064), 2015-11-10
Supplement: 41586_2015_BFnature16064_MOESM334_ESM.pdf [file 41586_2015_BFnature16064_MOESM334_ESM.pdf]

**Supplemental Table 1**

**qPCR Primer Sequences**

| <b>Gene</b>       | <b>Sequence</b>               |
|-------------------|-------------------------------|
| <i>Snai1</i> F    | CACACGCTGCCTTGTGTCT           |
| <i>Snai1</i> R    | GGTCAGCAAAGCACGGTT            |
| <i>Twist1</i> F   | CTGCCCTCGGACAAGCTGAG          |
| <i>Twist1</i> R   | CTAGTGGGACGCGGACATGG          |
| <i>Zeb1</i> F     | ACTGCAAGAAACGGTTTTCCC         |
| <i>Zeb1</i> R     | GGCGAGGAACACTGAGATGT          |
| <i>Zeb2</i> F     | ATTGCACATCAGACTTTGAGGAA       |
| <i>Zeb2</i> R     | ATAATGGCCGTGTCGCTTCG          |
| <i>Slug</i> F     | CACATTCGAACCCACACATTGCCT      |
| <i>Slug</i> R     | TGTGCCCTCAGGTTTGATCTGTCT      |
| <i>Vimentin</i> F | CTT GAA CGG AAA GTG GAA TCC T |
| <i>Vimentin</i> R | GTC AGG CTT GGA AAC GTC C     |
| <i>Foxc2</i> F    | AACCCAACAGCAAACCTTTCCC        |
| <i>Foxc2</i> R    | GCGTAGCTCGATAGGGCAG           |
| <i>Cdh2</i> F     | AGCGCAGTCTTACCGAAGG           |
| <i>Cdh2</i> R     | TCGCTGCTTTCATACTGAACTTT       |
| <i>Cdh1</i> F     | TCCTGCTGCTCCTACTGTTTC         |
| <i>Cdh1</i> R     | TTCATCAGGATTGGCAGGAC          |
| <i>ENT1</i> F     | CAG CCT CAG GAC AGG TAT       |
| <i>ENT1</i> R     | GTT TGT GAA ATA CTT GGT       |
| <i>ENT2</i> F     | TCA TTA CCG CCA TCC CGT       |
| <i>ENT2</i> R     | CCC AGT TGT TGA AGT TGA       |
| <i>ENT3</i> F     | GAGCCCCGAGTAACCATCAAG         |
| <i>ENT3</i> R     | CATTGAAGCGATCCTCTGGC          |
| <i>CNT1</i> F     | CCTGCTCTCTACTGCATA            |
| <i>CNT1</i> R     | GCAAGGGCTAGACCTCTC            |
| <i>CNT3</i> F     | GACCTTGAACGGCAGAAC            |
| <i>CNT3</i> R     | CTTTCTTTCCTAGAGGCT            |
| <i>GAPDH</i> F    | AGGTCGGTGTGAACGGATTTG         |
| <i>GAPDH</i> R    | TGTAGACCGTGTAGTTGAGGTCA       |
| <i>18S</i> F      | GTAACCCGTTGAACCCCAT           |
| <i>18S</i> R      | CCATCCAATCGGTAGTAGCG          |
